# Supplementary material for: Blind Depth-variant Deconvolution of 3D Data in Wide-field Fluorescence Microscopy
Source: PubMed Central journal article supplement (PMC5155489; doi:10.1038/srep09894), 2015-05-07
Supplement: srep09894-s5.pdf [file srep09894-s5.pdf]

## Supplementary Information

# Blind Depth-variant Deconvolution of 3D Data in Wide-field Fluorescence Microscopy

Boyoung Kim<sup>1,\*</sup> and Takeshi Naemura<sup>1</sup>

*<sup>1</sup>Graduate School of Information Science and Technology, The  
University of Tokyo, Tokyo, Japan*

\* Correspondence should be addressed to B.K. (bykim@nae-  
lab.org).

## **Supplementary Videos**

**Supplementary Video S1:** Blind depth-variant deconvolution result of 3D real fluorescence micro-bead after each iteration (transverse cut)

**Supplementary Video S2:** Blind depth-variant deconvolution result of 3D real fluorescence micro-bead after each iteration (transverse intensity profile)

**Supplementary Video S3:** Blind depth-variant deconvolution result of 3D real fluorescence micro-bead after each iteration (axial cut)

**Supplementary Video S4:** Blind depth-variant deconvolution result of 3D real fluorescence micro-bead after each iteration (axial intensity profile)
